# Supplementary material
Source: PubMed Central journal article supplement (PMC4820357)
Supplement: NIHMS765778-supplement-supplemental.pdf [file NIHMS765778-supplement-supplemental.pdf]

**Supplementary Table 1 Samples included in the analysis according to BLIND ordering.**

| Sample name         | Annotated time/stage | Counted reads (genes) | Counted reads (ERCC) | Counted genes |
|---------------------|----------------------|-----------------------|----------------------|---------------|
| <i>P. dumerilii</i> |                      |                       |                      |               |
| PT0005              | 300                  | 681568                | 41980                | 6640          |
| PT0001              | 60                   | 577220                | 70082                | 6385          |
| PT0003              | 180                  | 804010                | 124567               | 7157          |
| PT0004              | 240                  | 709031                | 118360               | 7076          |
| PT0006              | 360                  | 810083                | 107398               | 7091          |
| PT0007              | 420                  | 597310                | 112207               | 7435          |
| PT0008              | 480                  | 1377866               | 106535               | 8527          |
| PT0009              | 540                  | 900560                | 91019                | 7576          |
| PT0010              | 600                  | 998981                | 110855               | 7853          |
| PT0012              | 720                  | 700919                | 66042                | 7342          |
| PT0013              | 780                  | 465169                | 113705               | 7396          |
| PT0014              | 840                  | 572886                | 70201                | 7192          |
| PT0016              | 960                  | 922296                | 104135               | 8030          |
| PT0017              | 1020                 | 1059582               | 127037               | 8224          |
| PT0015              | 900                  | 765433                | 109974               | 8217          |
| PT0020              | 1200                 | 467940                | 100472               | 7000          |
| PT0019              | 1140                 | 620799                | 113260               | 7915          |
| PT0018              | 1080                 | 670991                | 93554                | 8242          |
| PT0025              | 1560                 | 538879                | 93809                | 6826          |
| PT0026              | 1620                 | 747435                | 94828                | 8275          |
| PT0024              | 1500                 | 614968                | 76925                | 8099          |
| PT0030              | 1860                 | 985442                | 87280                | 8665          |
| PT0027              | 1680                 | 1268911               | 136535               | 8899          |
| PT0028              | 1740                 | 1090567               | 95544                | 8871          |
| PT0029              | 1800                 | 1273122               | 122872               | 8874          |
| PT0031              | 1920                 | 1084301               | 81723                | 8769          |
| PT0032              | 1980                 | 662822                | 63513                | 8323          |
| PT0033              | 2040                 | 464284                | 46182                | 7416          |
| PT0034              | 2100                 | 628178                | 59307                | 8301          |
| PT0035              | 2160                 | 832949                | 75593                | 8763          |
| PT0037              | 2280                 | 966112                | 64257                | 8111          |
| PT0036              | 2220                 | 743666                | 58717                | 8605          |
| PT0038              | 2340                 | 717946                | 50838                | 8357          |
| PT0039              | 2400                 | 687201                | 59238                | 8354          |
| PT0040              | 2460                 | 739542                | 59378                | 8530          |
| PT0041              | 2520                 | 1403309               | 141475               | 9638          |
| PT0042              | 2580                 | 1653093               | 117712               | 9578          |
| PT0043              | 2640                 | 1318067               | 111798               | 9502          |
| PT0044              | 2700                 | 1373586               | 102004               | 9495          |
| PT0045              | 2760                 | 1390536               | 112141               | 9552          |

|        |      |         |        |      |
|--------|------|---------|--------|------|
| PT0046 | 2820 | 1195204 | 111805 | 9423 |
| PT0048 | 2940 | 1205721 | 93256  | 9585 |
| PT0049 | 3000 | 1394118 | 130792 | 9261 |
| PT0050 | 3060 | 725309  | 71418  | 8584 |
| PT0051 | 3120 | 743197  | 62149  | 4700 |
| PT0052 | 3180 | 860190  | 64738  | 5336 |
| PT0057 | 3480 | 2577933 | 115021 | 7420 |
| PT0054 | 3300 | 978923  | 74567  | 5510 |
| PT0053 | 3240 | 1249381 | 102656 | 5903 |
| PT0059 | 3600 | 1153911 | 103399 | 5693 |
| PT0056 | 3420 | 858784  | 77454  | 5132 |
| PT0058 | 3540 | 1147598 | 86748  | 5764 |
| PT0060 | 3660 | 824226  | 81604  | 5145 |
| PT0062 | 3780 | 547222  | 41772  | 4032 |
| PT0064 | 3900 | 804163  | 78776  | 4988 |
| PT0065 | 3960 | 866680  | 82850  | 5158 |
| PT0063 | 3840 | 928299  | 106576 | 5008 |
| PT0066 | 4020 | 868486  | 66620  | 4953 |
| PT0067 | 4080 | 1248041 | 124545 | 5506 |
| PT0068 | 4140 | 680387  | 68975  | 5033 |
| PT0070 | 4260 | 875054  | 83558  | 5420 |
| PT0072 | 4380 | 514979  | 72971  | 4656 |
| PT0069 | 4200 | 750849  | 78969  | 4619 |
| PT0073 | 4440 | 766357  | 101721 | 4518 |
| PT0075 | 4560 | 712341  | 91694  | 4394 |
| PT0080 | 4860 | 795394  | 93077  | 4919 |
| PT0074 | 4500 | 443912  | 54317  | 3759 |
| PT0076 | 4620 | 676428  | 76424  | 5263 |
| PT0077 | 4680 | 790667  | 105479 | 4755 |
| PT0078 | 4740 | 679305  | 85814  | 4625 |
| PT0079 | 4800 | 752087  | 98014  | 4529 |
| PT0082 | 4980 | 454756  | 66183  | 3840 |
| PT0091 | 5520 | 687313  | 118701 | 4729 |
| PT0081 | 4920 | 556274  | 93160  | 4139 |
| PT0084 | 5100 | 438558  | 52641  | 3853 |
| PT0093 | 5640 | 752933  | 114832 | 4778 |
| PT0092 | 5580 | 498673  | 77603  | 4146 |
| PT0088 | 5340 | 407727  | 34788  | 3508 |
| PT0087 | 5280 | 440506  | 60557  | 2927 |
| PT0090 | 5460 | 437535  | 53939  | 3532 |

*S. polychroa*

|        |   |         |       |       |
|--------|---|---------|-------|-------|
| FW0108 | 1 | 471534  | 11501 | 8582  |
| FW0130 | 3 | 433389  | 31223 | 8735  |
| FW0122 | 3 | 638065  | 22752 | 10082 |
| FW0112 | 2 | 553706  | 21409 | 9829  |
| FW0114 | 2 | 417217  | 29273 | 9039  |
| FW0132 | 3 | 806561  | 22969 | 10091 |
| FW0121 | 3 | 468622  | 22247 | 9528  |
| FW0115 | 2 | 519937  | 49135 | 9500  |
| FW0125 | 3 | 1032887 | 32095 | 11339 |
| FW0049 | 5 | 433472  | 74393 | 10237 |
| FW0042 | 4 | 501400  | 91382 | 10732 |
| FW0041 | 4 | 776945  | 90151 | 11521 |
| FW0038 | 4 | 715199  | 43534 | 12299 |
| FW0057 | 5 | 548386  | 46422 | 11484 |
| FW0043 | 4 | 844644  | 89355 | 11685 |
| FW0036 | 4 | 1032949 | 57962 | 12446 |
| FW0047 | 5 | 727616  | 68217 | 11949 |
| FW0050 | 5 | 512407  | 41458 | 11877 |
| FW0073 | 6 | 621893  | 60913 | 11663 |
| FW0065 | 6 | 412765  | 40131 | 11318 |
| FW0054 | 5 | 1112761 | 60194 | 12824 |
| FW0066 | 6 | 593949  | 74948 | 11557 |
| FW0061 | 6 | 513889  | 53023 | 11692 |
| FW0070 | 6 | 533586  | 61713 | 12387 |
| FW0035 | 4 | 788421  | 29769 | 13168 |
| FW0055 | 5 | 841916  | 58440 | 13127 |
| FW0067 | 6 | 562982  | 43189 | 11664 |
| FW0058 | 6 | 601292  | 38260 | 11684 |
| FW0051 | 5 | 1055676 | 47043 | 13393 |
| FW0064 | 6 | 622145  | 25725 | 12274 |
| FW0052 | 5 | 1251141 | 63796 | 13432 |
| FW0059 | 6 | 685246  | 41617 | 12496 |
| FW0069 | 6 | 1068561 | 66513 | 13311 |
| FW0084 | 7 | 832728  | 22879 | 13855 |
| FW0085 | 7 | 671228  | 19659 | 12584 |
| FW0088 | 7 | 1301374 | 38769 | 13849 |
| FW0089 | 7 | 956826  | 30829 | 13438 |
| FW0075 | 7 | 1091667 | 32793 | 13321 |
| FW0081 | 7 | 700371  | 33044 | 12329 |
| FW0080 | 7 | 1512296 | 34827 | 13854 |
| FW0078 | 7 | 1075723 | 49817 | 13109 |
| FW0079 | 7 | 1531600 | 37809 | 13726 |
| FW0077 | 7 | 672560  | 23161 | 12571 |
| FW0087 | 7 | 1623149 | 49002 | 14282 |
| FW0083 | 7 | 610429  | 33740 | 12963 |

|        |   |         |       |       |
|--------|---|---------|-------|-------|
| FW0092 | 8 | 1093508 | 13301 | 13451 |
| FW0090 | 8 | 563653  | 9625  | 12667 |
| FW0082 | 7 | 717279  | 28335 | 13338 |
| FW0100 | 8 | 801213  | 13495 | 12346 |
| FW0095 | 8 | 1035899 | 12617 | 12930 |
| FW0091 | 8 | 682548  | 13362 | 12022 |
| FW0103 | 8 | 863110  | 9278  | 12397 |
| FW0093 | 8 | 916690  | 12236 | 12689 |
| FW0098 | 8 | 847292  | 10568 | 13465 |
| FW0074 | 7 | 533076  | 16792 | 12713 |
| FW0096 | 8 | 741443  | 11368 | 12046 |
| FW0102 | 8 | 654591  | 11661 | 12013 |
| FW0101 | 8 | 609778  | 14848 | 11859 |

*C. elegans*

|        |     |         |       |       |
|--------|-----|---------|-------|-------|
| CE0046 | 30  | 648258  | 3421  | 7024  |
| CE0053 | 30  | 1168406 | 5598  | 6743  |
| CE0054 | 30  | 1762351 | 7725  | 6902  |
| CE0096 | -30 | 1697207 | 1882  | 8996  |
| CE0051 | 0   | 1349669 | 5381  | 6152  |
| CE0052 | 0   | 978778  | 3271  | 5781  |
| CE0095 | -50 | 2206884 | 3715  | 8861  |
| CE0101 | 40  | 2317349 | 4399  | 10086 |
| CE0098 | 10  | 2360636 | 3662  | 9408  |
| CE0103 | 60  | 1585271 | 4126  | 10453 |
| CE0104 | 70  | 896597  | 3306  | 9987  |
| CE0072 | 20  | 4557314 | 17625 | 10429 |
| CE0102 | 50  | 1499248 | 3392  | 10298 |
| CE0055 | 70  | 554674  | 3525  | 5508  |
| CE0056 | 70  | 699720  | 3837  | 5886  |
| CE0108 | 110 | 711957  | 2118  | 9696  |
| CE0057 | 110 | 1205412 | 7297  | 6785  |
| CE0107 | 100 | 1927968 | 6911  | 10775 |
| CE0109 | 120 | 1996361 | 6800  | 10502 |
| CE0060 | 140 | 692649  | 4325  | 5844  |
| CE0110 | 130 | 1264572 | 3738  | 10287 |
| CE0111 | 140 | 513094  | 1832  | 8462  |
| CE0112 | 150 | 1187968 | 3537  | 9822  |
| CE0113 | 160 | 1525934 | 4731  | 10120 |
| CE0114 | 170 | 1822764 | 3151  | 10460 |
| CE0074 | 200 | 1282092 | 10897 | 9251  |
| CE0115 | 180 | 1516342 | 3890  | 9986  |
| CE0086 | 200 | 959327  | 3331  | 9435  |
| CE0088 | 220 | 1550505 | 7086  | 9723  |
| CE0076 | 220 | 2867909 | 8550  | 10338 |
| CE0116 | 190 | 1128714 | 2388  | 9732  |
| CE0087 | 210 | 1396974 | 4220  | 10564 |

|        |     |         |       |       |
|--------|-----|---------|-------|-------|
| CE0120 | 230 | 1598295 | 2667  | 10576 |
| CE0092 | 290 | 514765  | 1324  | 9594  |
| CE0091 | 280 | 1309976 | 4121  | 10082 |
| CE0080 | 290 | 3169191 | 9077  | 11049 |
| CE0123 | 260 | 2225197 | 3765  | 11634 |
| CE0127 | 300 | 2664028 | 17494 | 11689 |
| CE0124 | 270 | 1824186 | 2771  | 11576 |
| CE0063 | 310 | 1566714 | 8092  | 7538  |
| CE0064 | 310 | 1143535 | 4420  | 7103  |
| CE0128 | 310 | 814212  | 1901  | 9957  |
| CE0081 | 380 | 760663  | 1935  | 11186 |
| CE0129 | 320 | 2758725 | 10587 | 12143 |
| CE0066 | 340 | 1104506 | 4214  | 6786  |
| CE0133 | 360 | 1936400 | 9040  | 11321 |
| CE0130 | 330 | 2254120 | 8435  | 11866 |
| CE0132 | 350 | 1933195 | 9289  | 11760 |
| CE0134 | 370 | 1426465 | 2610  | 10637 |
| CE0067 | 380 | 1908726 | 8823  | 7890  |
| CE0082 | 400 | 1258477 | 3768  | 11111 |
| CE0131 | 340 | 842531  | 2119  | 10921 |
| CE0068 | 380 | 1913256 | 6810  | 8250  |
| CE0136 | 390 | 2600646 | 11881 | 12378 |
| CE0069 | 400 | 1312991 | 6630  | 7458  |
| CE0138 | 410 | 1763959 | 6422  | 11426 |
| CE0139 | 420 | 2247757 | 9363  | 12184 |
| CE0020 | 410 | 855654  | 2582  | 9511  |
| CE0005 | 440 | 531473  | 2006  | 8369  |
| CE0015 | 450 | 807643  | 2412  | 9059  |
| CE0013 | 430 | 1661072 | 3784  | 10748 |
| CE0017 | 490 | 910328  | 2516  | 9931  |
| CE0016 | 510 | 718413  | 1657  | 9359  |
| CE0034 | 540 | 662718  | 2642  | 8281  |
| CE0021 | 550 | 891965  | 3063  | 9507  |
| CE0024 | 580 | 686643  | 2006  | 9226  |
| CE0014 | 600 | 559134  | 1220  | 9612  |
| CE0033 | 620 | 821268  | 1734  | 9091  |
| CE0023 | 630 | 785772  | 2826  | 9125  |
| CE0035 | 690 | 506608  | 1672  | 8367  |
| CE0025 | 660 | 623795  | 2060  | 7983  |
| CE0032 | 700 | 1006677 | 3472  | 8207  |
| CE0028 | 740 | 634443  | 2089  | 7536  |
| CE0042 | 640 | 1216706 | 4155  | 9550  |
| CE0045 | 750 | 999983  | 2326  | 9421  |
| CE0048 | 840 | 662565  | 2662  | 8122  |
| CE0050 | 830 | 1306826 | 3789  | 9474  |
| CE0049 | 800 | 750425  | 1611  | 8886  |

|        |      |                     |        |       |
|--------|------|---------------------|--------|-------|
| CE0040 | 760  | 878648              | 2612   | 8705  |
| CE0037 | 780  | 511198              | 1077   | 8503  |
| CE0041 | 810  | 877461              | 1578   | 9249  |
|        |      | <i>H. dujardini</i> |        |       |
| HD0008 | 270  | 2175441             | 312559 | 8789  |
| HD0010 | 360  | 1604242             | 350364 | 8379  |
| HD0005 | 120  | 1637670             | 176151 | 8392  |
| HD0007 | 240  | 4196340             | 530616 | 9002  |
| HD0006 | 180  | 2613662             | 307598 | 8642  |
| HD0112 | 960  | 774196              | 3367   | 9294  |
| HD0110 | 900  | 1482692             | 6462   | 9901  |
| HD0111 | 930  | 832592              | 3213   | 9315  |
| HD0113 | 990  | 1056906             | 3903   | 9203  |
| HD0004 | 90   | 4331054             | 388647 | 9059  |
| HD0009 | 300  | 4972036             | 414583 | 8885  |
| HD0002 | 30   | 3039305             | 245146 | 8725  |
| HD0012 | 420  | 1587171             | 187253 | 8447  |
| HD0001 | 0    | 3650555             | 346205 | 8875  |
| HD0003 | 60   | 3426322             | 517121 | 9369  |
| HD0013 | 450  | 3699814             | 696436 | 8830  |
| HD0014 | 480  | 1442738             | 180134 | 7639  |
| HD0015 | 510  | 4104690             | 436657 | 8680  |
| HD0016 | 540  | 1699612             | 213395 | 7884  |
| HD0119 | 1170 | 848682              | 5905   | 9563  |
| HD0124 | 1320 | 425334              | 3084   | 9233  |
| HD0123 | 1290 | 1186475             | 7350   | 10034 |
| HD0125 | 1350 | 1204582             | 7023   | 10103 |
| HD0126 | 1380 | 523004              | 3072   | 9631  |
| HD0055 | 2280 | 752928              | 154266 | 6233  |
| HD0026 | 1410 | 609737              | 133449 | 5222  |
| HD0027 | 1440 | 1087654             | 183117 | 6382  |
| HD0029 | 1500 | 1756168             | 332678 | 7264  |
| HD0028 | 1470 | 1010468             | 151303 | 6459  |
| HD0030 | 1530 | 610275              | 127237 | 5692  |
| HD0031 | 1560 | 1067481             | 356034 | 6729  |
| HD0032 | 1590 | 1208796             | 222402 | 6899  |
| HD0033 | 1620 | 811742              | 135209 | 5516  |
| HD0034 | 1650 | 657814              | 137793 | 5657  |
| HD0035 | 1680 | 1156732             | 232701 | 6585  |
| HD0038 | 1770 | 748268              | 145285 | 6007  |
| HD0041 | 1860 | 1292816             | 292470 | 6391  |
| HD0036 | 1710 | 796306              | 158187 | 5723  |
| HD0042 | 1890 | 835553              | 180827 | 5946  |
| HD0043 | 1920 | 790928              | 178789 | 5645  |
| HD0048 | 2070 | 537381              | 82532  | 4702  |
| HD0051 | 2160 | 500395              | 115970 | 4651  |

|        |      |         |        |      |
|--------|------|---------|--------|------|
| HD0054 | 2250 | 1632110 | 233475 | 7475 |
| HD0053 | 2220 | 1100872 | 205535 | 6381 |
| HD0056 | 2310 | 2400687 | 346938 | 7874 |
| HD0057 | 2340 | 1016999 | 134358 | 6974 |
| HD0060 | 2430 | 2177144 | 349696 | 8043 |
| HD0063 | 2520 | 705171  | 118899 | 6158 |
| HD0067 | 2640 | 1220231 | 205754 | 7479 |
| HD0066 | 2610 | 1263915 | 184793 | 7607 |
| HD0071 | 2760 | 799844  | 119118 | 6393 |
| HD0069 | 2700 | 921083  | 149880 | 7054 |
| HD0070 | 2730 | 1124678 | 216625 | 7274 |
| HD0075 | 2880 | 791611  | 146607 | 6319 |
| HD0072 | 2790 | 694302  | 123316 | 5630 |
| HD0078 | 2970 | 521121  | 121616 | 5659 |
| HD0073 | 2820 | 733073  | 118264 | 6760 |
| HD0068 | 2670 | 2077092 | 383030 | 8198 |
| HD0074 | 2850 | 546807  | 94611  | 5952 |
| HD0022 | 2760 | 2026191 | 183845 | 9327 |
| HD0023 | 2850 | 915069  | 97116  | 7401 |
| HD0025 | 2940 | 1511717 | 194827 | 7381 |

*D. melanogaster*

|        |     |         |        |      |
|--------|-----|---------|--------|------|
| DM0002 | 0   | 2687595 | 85237  | 7223 |
| DM0001 | -15 | 2286826 | 79587  | 7173 |
| DM0004 | 30  | 1670023 | 85718  | 7176 |
| DM0003 | 15  | 2331605 | 80147  | 7221 |
| DM0005 | 45  | 1213557 | 54308  | 6661 |
| DM0012 | 150 | 609408  | 51642  | 4144 |
| DM0007 | 75  | 2182589 | 104198 | 7320 |
| DM0008 | 90  | 2388874 | 102946 | 7467 |
| DM0009 | 105 | 1638267 | 66695  | 7056 |
| DM0011 | 135 | 561108  | 32150  | 5581 |
| DM0014 | 180 | 1497773 | 73309  | 7025 |
| DM0018 | 240 | 2027556 | 89589  | 7374 |
| DM0013 | 165 | 1438210 | 83594  | 6936 |
| DM0006 | 60  | 1979477 | 89999  | 7542 |
| DM0016 | 210 | 439350  | 86085  | 5173 |
| DM0015 | 195 | 2197202 | 104762 | 7785 |
| DM0019 | 255 | 2078411 | 112206 | 7656 |
| DM0020 | 270 | 2819385 | 129801 | 8113 |
| DM0021 | 285 | 2006424 | 114188 | 7636 |
| DM0024 | 330 | 1300032 | 81786  | 6450 |
| DM0023 | 315 | 1849586 | 139236 | 7416 |
| DM0022 | 300 | 1416117 | 89966  | 7222 |
| DM0042 | 600 | 584875  | 79754  | 4014 |
| DM0041 | 585 | 815158  | 77702  | 5361 |
| DM0037 | 525 | 1217773 | 94130  | 5907 |

|        |      |         |        |       |
|--------|------|---------|--------|-------|
| DM0031 | 435  | 1587831 | 106806 | 6706  |
| DM0034 | 480  | 631243  | 47551  | 5268  |
| DM0025 | 345  | 1740242 | 74823  | 7182  |
| DM0028 | 390  | 839049  | 45894  | 6112  |
| DM0026 | 360  | 2186242 | 104990 | 7458  |
| DM0033 | 465  | 960366  | 79692  | 6299  |
| DM0039 | 555  | 1506619 | 98682  | 6339  |
| DM0036 | 510  | 1523878 | 114449 | 6549  |
| DM0035 | 495  | 898278  | 52110  | 6256  |
| DM0027 | 375  | 2407313 | 92392  | 7717  |
| DM0030 | 420  | 2501751 | 141167 | 7519  |
| DM0043 | 615  | 1503175 | 96367  | 6366  |
| DM0040 | 570  | 2747282 | 171154 | 7732  |
| DM0032 | 450  | 2081128 | 99747  | 7479  |
| DM0044 | 630  | 1110109 | 118742 | 5921  |
| DM0029 | 405  | 1947457 | 95440  | 7853  |
| DM0047 | 675  | 1065624 | 64189  | 8312  |
| DM0052 | 750  | 1706293 | 98886  | 8721  |
| DM0038 | 540  | 2486403 | 89722  | 8229  |
| DM0045 | 645  | 2094989 | 107703 | 7908  |
| DM0054 | 780  | 1615614 | 92521  | 9200  |
| DM0060 | 870  | 1611063 | 85511  | 9082  |
| DM0048 | 690  | 1647145 | 84474  | 9452  |
| DM0046 | 660  | 1502524 | 66495  | 9194  |
| DM0053 | 765  | 1611588 | 72886  | 9169  |
| DM0059 | 855  | 1624813 | 79244  | 9313  |
| DM0064 | 930  | 1245187 | 71134  | 8975  |
| DM0050 | 720  | 823617  | 35184  | 8247  |
| DM0055 | 795  | 1644069 | 71798  | 9312  |
| DM0049 | 705  | 2441235 | 98570  | 9848  |
| DM0061 | 885  | 1665387 | 68338  | 9186  |
| DM0062 | 900  | 1872826 | 105635 | 9304  |
| DM0066 | 960  | 1932002 | 107735 | 9488  |
| DM0058 | 840  | 1741904 | 91362  | 9325  |
| DM0051 | 735  | 1964421 | 79688  | 9581  |
| DM0071 | 1035 | 2518821 | 125287 | 9698  |
| DM0056 | 810  | 902574  | 33528  | 8542  |
| DM0065 | 945  | 2571015 | 99631  | 9825  |
| DM0068 | 990  | 2030130 | 103458 | 9382  |
| DM0067 | 975  | 1609392 | 65257  | 9165  |
| DM0070 | 1020 | 3308015 | 109493 | 10184 |
| DM0063 | 915  | 1376068 | 56603  | 8991  |
| DM0084 | 1230 | 2843277 | 118768 | 9469  |
| DM0078 | 1140 | 2774847 | 120424 | 9759  |
| DM0081 | 1185 | 2577832 | 136355 | 9408  |
| DM0085 | 1245 | 1193766 | 55219  | 8394  |



|        |      |                      |        |       |
|--------|------|----------------------|--------|-------|
| DM0077 | 1125 | 2896821              | 117952 | 9702  |
| DM0090 | 1320 | 2173903              | 103114 | 9494  |
| DM0087 | 1275 | 3097439              | 132949 | 9936  |
| DM0088 | 1290 | 2483315              | 120684 | 9739  |
| DM0083 | 1215 | 1868625              | 79879  | 9370  |
| DM0089 | 1305 | 1468253              | 110700 | 8008  |
|        |      | <i>S. purpuratus</i> |        |       |
| SU0005 | 200  | 694425               | 222946 | 17078 |
| SU0011 | 760  | 491960               | 152687 | 16672 |
| SU0141 | 360  | 401022               | 37653  | 16203 |
| SU0008 | 320  | 1415058              | 232786 | 18948 |
| SU0052 | 360  | 672588               | 239782 | 17363 |
| SU0054 | 440  | 1585131              | 292221 | 19412 |
| SU0055 | 480  | 725898               | 249692 | 18998 |
| SU0060 | 1000 | 990532               | 327474 | 18381 |
| SU0146 | 1200 | 488216               | 31363  | 17603 |
| SU0070 | 1720 | 2280500              | 183101 | 20075 |
| SU0149 | 1680 | 489874               | 33934  | 16575 |
| SU0023 | 1520 | 486542               | 133325 | 13861 |
| SU0020 | 1400 | 895132               | 217758 | 18620 |
| SU0064 | 1160 | 874126               | 354280 | 17203 |
| SU0017 | 1280 | 725490               | 259257 | 16619 |
| SU0018 | 1320 | 413657               | 108452 | 13752 |
| SU0021 | 1440 | 551938               | 150014 | 15703 |
| SU0025 | 1600 | 675210               | 169115 | 15443 |
| SU0067 | 1280 | 547609               | 153792 | 17020 |
| SU0066 | 1240 | 648934               | 161810 | 15412 |
| SU0024 | 1560 | 789626               | 181915 | 16121 |
| SU0068 | 1640 | 985780               | 258540 | 17770 |
| SU0026 | 1960 | 459678               | 117522 | 15944 |
| SU0071 | 1760 | 458624               | 118326 | 15225 |
| SU0027 | 2000 | 556810               | 126239 | 14435 |
| SU0074 | 1880 | 890317               | 257775 | 17343 |
| SU0072 | 1800 | 689737               | 216902 | 16242 |
| SU0031 | 2480 | 2451801              | 446254 | 19424 |
| SU0078 | 2120 | 834394               | 164665 | 16268 |
| SU0028 | 2360 | 533340               | 129351 | 13431 |
| SU0080 | 2200 | 666546               | 214543 | 16339 |
| SU0079 | 2160 | 405203               | 90149  | 14569 |
| SU0082 | 2280 | 472338               | 121927 | 14376 |
| SU0077 | 2080 | 565569               | 138318 | 16565 |
| SU0083 | 2320 | 542577               | 124452 | 15681 |
| SU0033 | 2560 | 657655               | 184995 | 14696 |
| SU0076 | 2040 | 429260               | 103793 | 15710 |
| SU0034 | 2600 | 572913               | 153177 | 13825 |
| SU0035 | 2640 | 748366               | 177795 | 17021 |

|                 |      |         |        |       |
|-----------------|------|---------|--------|-------|
| SU0081          | 2240 | 528366  | 142691 | 15330 |
| SU0088          | 2840 | 769838  | 250473 | 17189 |
| SU0085          | 2720 | 408219  | 107583 | 15825 |
| SU0038          | 3080 | 1472470 | 300715 | 18581 |
| SU0089          | 2880 | 455466  | 98749  | 15430 |
| SU0086          | 2760 | 405528  | 117327 | 14902 |
| SU0036          | 3000 | 457402  | 100956 | 13472 |
| SU0040          | 3160 | 467079  | 112262 | 13194 |
| SU0092          | 3320 | 1021627 | 264444 | 18264 |
| SU0094          | 3400 | 1154311 | 253894 | 18282 |
| SU0099          | 3600 | 596623  | 129034 | 17130 |
| SU0100          | 3640 | 650766  | 170427 | 16934 |
| SU0095          | 3440 | 467521  | 91969  | 16997 |
| SU0097          | 3520 | 466908  | 111014 | 17239 |
| SU0098          | 3560 | 640479  | 162232 | 17593 |
| SU0043          | 3280 | 615618  | 141404 | 16690 |
| SU0093          | 3360 | 601745  | 120555 | 17570 |
| SU0128          | 4200 | 1010615 | 204083 | 18595 |
| SU0110          | 4120 | 498397  | 128284 | 16128 |
| SU0103          | 3840 | 430828  | 100009 | 15970 |
| SU0111          | 4160 | 548351  | 124248 | 17044 |
| SU0124          | 4520 | 621433  | 173921 | 16767 |
| SU0122          | 4440 | 650927  | 173151 | 16979 |
| SU0116          | 4360 | 1096769 | 292663 | 17937 |
| SU0125          | 4560 | 535307  | 185498 | 16043 |
| SU0108          | 4040 | 697217  | 172571 | 16293 |
| SU0109          | 4080 | 403679  | 97297  | 16219 |
| SU0114          | 4280 | 821493  | 275302 | 17374 |
| SU0096          | 3480 | 785953  | 198521 | 17230 |
| <i>D. rerio</i> |      |         |        |       |
| ZF0007          | 280  | 727866  | 53207  | 6673  |
| ZF0003          | 120  | 1620208 | 73343  | 9398  |
| ZF0004          | 160  | 1197803 | 44692  | 8054  |
| ZF0001          | 40   | 689209  | 41857  | 5761  |
| ZF0006          | 240  | 1015423 | 57356  | 8345  |
| ZF0013          | 520  | 678107  | 38723  | 6397  |
| ZF0016          | 640  | 511848  | 23998  | 5942  |
| ZF0015          | 600  | 908481  | 35065  | 7194  |
| ZF0017          | 680  | 2138819 | 81564  | 8277  |
| ZF0020          | 800  | 1552826 | 47213  | 8075  |
| ZF0018          | 720  | 958813  | 29556  | 7121  |
| ZF0019          | 760  | 1454934 | 54578  | 7281  |
| ZF0022          | 880  | 950626  | 34192  | 6701  |
| ZF0025          | 1000 | 905647  | 27730  | 7040  |
| ZF0026          | 1040 | 1255829 | 26818  | 8140  |
| ZF0027          | 1080 | 1342410 | 29771  | 8621  |

|        |      |         |       |       |
|--------|------|---------|-------|-------|
| ZF0023 | 920  | 2279740 | 69876 | 8649  |
| ZF0029 | 1160 | 785984  | 23900 | 6641  |
| ZF0028 | 1120 | 858627  | 18800 | 7686  |
| ZF0030 | 1200 | 1277654 | 24414 | 8313  |
| ZF0034 | 1360 | 584710  | 12263 | 5004  |
| ZF0033 | 1320 | 1002283 | 24633 | 6203  |
| ZF0031 | 1240 | 1723148 | 39577 | 9376  |
| ZF0024 | 960  | 1391813 | 34465 | 8022  |
| ZF0032 | 1280 | 851981  | 15390 | 7600  |
| ZF0036 | 1440 | 1128533 | 18408 | 7225  |
| ZF0037 | 1480 | 1164889 | 36831 | 6915  |
| ZF0038 | 1520 | 1610955 | 19712 | 8006  |
| ZF0039 | 1560 | 1443913 | 23388 | 7890  |
| ZF0040 | 1600 | 1047890 | 15738 | 6991  |
| ZF0042 | 1680 | 2859897 | 35617 | 11253 |
| ZF0041 | 1640 | 1528963 | 27948 | 8850  |
| ZF0043 | 1720 | 1312704 | 19097 | 8660  |
| ZF0045 | 1800 | 2061063 | 28180 | 9779  |
| ZF0044 | 1760 | 2656648 | 31808 | 10440 |
| ZF0046 | 1840 | 1221576 | 16993 | 8746  |
| ZF0047 | 1880 | 1088575 | 13819 | 7686  |
| ZF0048 | 1920 | 1075421 | 15507 | 8452  |
| ZF0054 | 2160 | 980215  | 13041 | 7158  |
| ZF0052 | 2080 | 3394933 | 46611 | 10403 |
| ZF0049 | 1960 | 4577296 | 71264 | 10991 |
| ZF0050 | 2000 | 2005815 | 36280 | 9461  |
| ZF0051 | 2040 | 4570469 | 68806 | 10776 |
| ZF0057 | 2280 | 3934051 | 34680 | 11558 |
| ZF0055 | 2200 | 2276658 | 21254 | 10690 |
| ZF0056 | 2240 | 1509127 | 18364 | 8925  |
| ZF0059 | 2360 | 1896378 | 17889 | 10027 |
| ZF0053 | 2120 | 3062606 | 48685 | 9795  |
| ZF0058 | 2320 | 1360520 | 16528 | 8586  |
| ZF0062 | 2480 | 2917992 | 39453 | 9476  |
| ZF0060 | 2400 | 720648  | 8306  | 7052  |
| ZF0061 | 2440 | 1744615 | 17657 | 8908  |
| ZF0074 | 2960 | 1520112 | 31596 | 8422  |
| ZF0082 | 3280 | 1683627 | 49090 | 7213  |
| ZF0084 | 3360 | 2653951 | 59333 | 8624  |
| ZF0064 | 2560 | 3945928 | 39056 | 10578 |
| ZF0073 | 2920 | 2368533 | 27347 | 10779 |
| ZF0076 | 3040 | 1837187 | 24342 | 9642  |
| ZF0083 | 3320 | 2661693 | 29003 | 8945  |
| ZF0063 | 2520 | 2256553 | 25498 | 9457  |
| ZF0065 | 2600 | 810657  | 10645 | 5918  |
| ZF0069 | 2760 | 3023994 | 38138 | 10383 |

|        |      |                     |        |       |
|--------|------|---------------------|--------|-------|
| ZF0068 | 2720 | 4709802             | 53410  | 10819 |
| ZF0071 | 2840 | 1741004             | 18074  | 9835  |
| ZF0072 | 2880 | 2647030             | 27937  | 10665 |
| ZF0078 | 3120 | 3485547             | 41786  | 10397 |
| ZF0070 | 2800 | 1668034             | 18621  | 8784  |
| ZF0081 | 3240 | 2585745             | 41132  | 8938  |
| ZF0077 | 3080 | 1466102             | 17802  | 9400  |
| ZF0087 | 3480 | 1343935             | 17005  | 7988  |
| ZF0092 | 3680 | 1055016             | 13398  | 8181  |
| ZF0086 | 3440 | 591653              | 13417  | 5377  |
| ZF0104 | 4160 | 1397155             | 24460  | 8014  |
| ZF0094 | 3760 | 10217895            | 113742 | 13333 |
| ZF0090 | 3600 | 1771105             | 22862  | 9193  |
| ZF0079 | 3160 | 2679793             | 29229  | 9708  |
| ZF0085 | 3400 | 2325011             | 21449  | 9462  |
| ZF0089 | 3560 | 1477199             | 12459  | 9392  |
| ZF0095 | 3800 | 4164173             | 35311  | 11898 |
| ZF0101 | 4040 | 5788896             | 52233  | 12595 |
| ZF0099 | 3960 | 4234659             | 40472  | 12279 |
| ZF0098 | 3920 | 3583393             | 37101  | 10984 |
| ZF0102 | 4080 | 2568150             | 23451  | 11003 |
| ZF0097 | 3880 | 3213241             | 28746  | 10891 |
| ZF0088 | 3520 | 2347639             | 23857  | 10841 |
| ZF0105 | 4200 | 554087              | 7714   | 5481  |
| ZF0093 | 3720 | 1204765             | 9868   | 8750  |
| ZF0103 | 4120 | 1480502             | 16683  | 9634  |
|        |      | <i>N. vectensis</i> |        |       |
| NV0008 | 220  | 896172              | 361538 | 19834 |
| NV0004 | 80   | 594349              | 214018 | 18115 |
| NV0050 | -20  | 1018123             | 370482 | 18177 |
| NV0002 | 20   | 787233              | 219590 | 18629 |
| NV0003 | 40   | 888605              | 351895 | 19419 |
| NV0007 | 200  | 912053              | 369267 | 19144 |
| NV0012 | 400  | 1012741             | 422783 | 20577 |
| NV0016 | 560  | 509348              | 218071 | 17169 |
| NV0019 | 680  | 1333573             | 468437 | 19805 |
| NV0024 | 880  | 772685              | 192510 | 17997 |
| NV0022 | 800  | 542925              | 163051 | 16619 |
| NV0023 | 840  | 862248              | 242205 | 18427 |
| NV0026 | 960  | 1341689             | 301184 | 22008 |
| NV0028 | 1060 | 766545              | 164216 | 19390 |
| NV0030 | 1160 | 1706574             | 432428 | 23076 |
| NV0029 | 1120 | 1676973             | 353943 | 22457 |
| NV0036 | 1400 | 1402882             | 266953 | 22497 |
| NV0035 | 1360 | 535853              | 151843 | 19044 |
| NV0039 | 1520 | 811057              | 235267 | 20263 |

|        |      |         |        |       |
|--------|------|---------|--------|-------|
| NV0033 | 1280 | 946697  | 207461 | 21491 |
| NV0031 | 1200 | 1541825 | 314689 | 22294 |
| NV0045 | 1760 | 612056  | 189041 | 19720 |
| NV0049 | 1920 | 591373  | 183623 | 19787 |
| NV0034 | 1320 | 1602804 | 237707 | 22615 |
| NV0032 | 1240 | 1368668 | 258069 | 22118 |
| NV0037 | 1440 | 1572334 | 186245 | 22907 |
| NV0038 | 1480 | 1173944 | 182756 | 21659 |
| NV0052 | 2000 | 2051815 | 406131 | 25843 |
| NV0053 | 2040 | 518980  | 169426 | 20840 |
| NV0041 | 1600 | 1076231 | 126558 | 22012 |
| NV0073 | 2840 | 741450  | 99210  | 22102 |
| NV0065 | 2520 | 1041722 | 241318 | 23846 |
| NV0060 | 2320 | 921595  | 222789 | 23314 |
| NV0058 | 2240 | 745031  | 283383 | 21826 |
| NV0055 | 2120 | 1342897 | 297289 | 24030 |
| NV0062 | 2400 | 986182  | 197858 | 22893 |
| NV0063 | 2440 | 658387  | 142336 | 21246 |
| NV0051 | 1960 | 1755470 | 254241 | 23785 |
| NV0059 | 2280 | 738715  | 180503 | 21696 |
| NV0044 | 1720 | 1296502 | 210154 | 22270 |
| NV0047 | 1840 | 736539  | 118472 | 20362 |
| NV0042 | 1640 | 1124264 | 139030 | 21742 |
| NV0048 | 1880 | 812631  | 112153 | 21410 |
| NV0072 | 2800 | 792349  | 160601 | 21599 |
| NV0069 | 2680 | 1206247 | 218295 | 23451 |
| NV0040 | 1560 | 2646585 | 330586 | 23553 |
| NV0054 | 2080 | 1554742 | 201762 | 23919 |
| NV0067 | 2600 | 1678711 | 185449 | 25046 |
| NV0070 | 2720 | 1460701 | 222754 | 24902 |
| NV0107 | 3000 | 701998  | 71247  | 17336 |
| NV0071 | 2760 | 1247919 | 149037 | 24098 |
| NV0117 | 2600 | 1412429 | 98334  | 20407 |
| NV0113 | 2760 | 871727  | 41458  | 18818 |
| NV0066 | 2560 | 1970889 | 175561 | 25283 |
| NV0118 | 2560 | 1634079 | 93557  | 20516 |
| NV0064 | 2480 | 1405665 | 181293 | 24451 |
| NV0110 | 2880 | 649289  | 87303  | 16897 |
| NV0079 | 4120 | 758031  | 70374  | 18521 |
| NV0075 | 4280 | 953494  | 60170  | 19921 |
| NV0121 | 2440 | 1063925 | 53738  | 19173 |
| NV0105 | 3080 | 1492204 | 65827  | 21791 |
| NV0116 | 2640 | 1335235 | 89529  | 20292 |
| NV0114 | 2720 | 1162650 | 75428  | 19165 |
| NV0100 | 3280 | 1470447 | 88916  | 20338 |
| NV0120 | 2480 | 729577  | 64933  | 17271 |

|        |      |         |        |       |
|--------|------|---------|--------|-------|
| NV0084 | 3920 | 604729  | 53095  | 17105 |
| NV0104 | 3120 | 1629528 | 109223 | 20469 |
| NV0092 | 3600 | 520066  | 68675  | 15544 |
| NV0102 | 3200 | 2029785 | 127671 | 22175 |
| NV0098 | 3360 | 1251692 | 54897  | 20500 |
| NV0108 | 2960 | 1672773 | 83075  | 20575 |
| NV0109 | 2920 | 827571  | 36112  | 18143 |
| NV0097 | 3400 | 1016876 | 57309  | 19147 |
| NV0091 | 3640 | 796298  | 61806  | 18948 |
| NV0078 | 4160 | 677007  | 42633  | 16850 |
| NV0093 | 3560 | 1827588 | 102199 | 21854 |
| NV0087 | 3800 | 843433  | 55310  | 18312 |
| NV0090 | 3680 | 2113426 | 91948  | 21906 |
| NV0095 | 3480 | 1212798 | 90500  | 19807 |
| NV0088 | 3760 | 1910978 | 121762 | 21386 |
| NV0099 | 3320 | 1234653 | 56370  | 19921 |
| NV0089 | 3720 | 1175599 | 69637  | 19340 |
| NV0094 | 3520 | 1379810 | 93300  | 19699 |

*A. queenslandica*

|        |   |         |       |       |
|--------|---|---------|-------|-------|
| AQ0100 | 1 | 944757  | 54991 | 14168 |
| AQ0065 | 1 | 1700085 | 83980 | 15923 |
| AQ0099 | 1 | 1587647 | 71348 | 14468 |
| AQ0003 | 1 | 2591430 | 79498 | 21795 |
| AQ0028 | 2 | 2116187 | 32683 | 19571 |
| AQ0004 | 2 | 849645  | 8919  | 18516 |
| AQ0059 | 2 | 1806685 | 15390 | 14626 |
| AQ0063 | 2 | 3563847 | 84922 | 17165 |
| AQ0005 | 2 | 915998  | 23753 | 15713 |
| AQ0060 | 2 | 2361730 | 49107 | 17099 |
| AQ0009 | 2 | 1975705 | 60079 | 16690 |
| AQ0051 | 3 | 1678767 | 29131 | 14632 |
| AQ0010 | 3 | 2449683 | 40721 | 17602 |
| AQ0068 | 3 | 2026721 | 40438 | 17228 |
| AQ0008 | 3 | 2716028 | 60261 | 17959 |
| AQ0017 | 3 | 4997392 | 68359 | 24835 |
| AQ0064 | 3 | 2862907 | 37234 | 17450 |
| AQ0006 | 3 | 925328  | 21712 | 14393 |
| AQ0074 | 4 | 1625998 | 48350 | 14157 |
| AQ0078 | 4 | 2596022 | 94898 | 14898 |
| AQ0030 | 4 | 693474  | 11504 | 15143 |
| AQ0097 | 5 | 1045072 | 49556 | 12359 |
| AQ0066 | 4 | 2764340 | 50498 | 15566 |
| AQ0048 | 4 | 1051721 | 21361 | 15242 |
| AQ0079 | 5 | 1286013 | 13662 | 13647 |
| AQ0007 | 5 | 1738658 | 39833 | 16727 |
| AQ0040 | 4 | 1812023 | 28369 | 16594 |

|        |     |                 |       |       |
|--------|-----|-----------------|-------|-------|
| AQ0070 | 6   | 1894790         | 11660 | 14669 |
| AQ0002 | 6   | 1033268         | 16287 | 14097 |
| AQ0095 | 5   | 4359554         | 85937 | 17112 |
| AQ0026 | 6   | 1552142         | 21443 | 16548 |
| AQ0085 | 6   | 2860800         | 63374 | 15779 |
| AQ0042 | 6   | 1482777         | 20315 | 15134 |
| AQ0088 | 5   | 2753331         | 84296 | 15700 |
| AQ0013 | 6   | 2002920         | 34096 | 17599 |
| AQ0019 | 7   | 2576299         | 66771 | 16002 |
| AQ0032 | 7   | 923915          | 14340 | 14370 |
| AQ0038 | 7   | 965698          | 18612 | 13973 |
| AQ0001 | 7   | 1254080         | 29743 | 14651 |
| AQ0027 | 7   | 1433618         | 23955 | 14710 |
| AQ0057 | 7   | 1683613         | 71677 | 15969 |
| AQ0029 | 8   | 1017487         | 25489 | 16946 |
| AQ0084 | 8   | 1505063         | 68667 | 14334 |
| AQ0034 | 8   | 849712          | 22642 | 15224 |
| AQ0025 | 8   | 1387416         | 73188 | 16099 |
| AQ0022 | 8   | 1469511         | 63132 | 16109 |
| AQ0081 | 8   | 1118943         | 52746 | 13913 |
| AQ0094 | 8   | 1307495         | 72324 | 14293 |
| AQ0096 | 8   | 1057642         | 56701 | 12784 |
| AQ0053 | 8   | 801275          | 51360 | 11896 |
| AQ0098 | 7   | 1000900         | 48920 | 12023 |
|        |     | <i>M. leidy</i> |       |       |
| ML0043 | 120 | 401652          | 5866  | 6246  |
| ML0022 | 60  | 1861129         | 5023  | 8201  |
| ML0042 | 60  | 1151164         | 10020 | 7760  |
| ML0024 | 180 | 2036972         | 4598  | 8530  |
| ML0023 | 120 | 1622510         | 4936  | 7956  |
| ML0021 | 0   | 2423255         | 6028  | 8753  |
| ML0001 | 0   | 1663802         | 3814  | 8406  |
| ML0044 | 180 | 864377          | 8207  | 7486  |
| ML0025 | 240 | 1592641         | 4490  | 8268  |
| ML0002 | 60  | 2539697         | 4510  | 9048  |
| ML0003 | 120 | 3205977         | 4701  | 9412  |
| ML0004 | 180 | 2762924         | 4495  | 9267  |
| ML0045 | 240 | 554706          | 6577  | 7319  |
| ML0046 | 270 | 953736          | 10091 | 8116  |
| ML0026 | 270 | 1765162         | 4089  | 8688  |
| ML0047 | 300 | 678408          | 5677  | 7739  |
| ML0006 | 270 | 1854929         | 3620  | 9418  |
| ML0007 | 300 | 999350          | 3301  | 8587  |
| ML0008 | 330 | 1434231         | 4476  | 9348  |
| ML0029 | 360 | 2377873         | 7259  | 9655  |
| ML0049 | 360 | 872390          | 8753  | 8668  |

|        |      |         |       |       |
|--------|------|---------|-------|-------|
| ML0011 | 420  | 1382830 | 4254  | 9287  |
| ML0027 | 300  | 2299919 | 8262  | 9794  |
| ML0009 | 360  | 1994545 | 4825  | 10246 |
| ML0030 | 390  | 1424209 | 6057  | 8847  |
| ML0051 | 420  | 507616  | 6414  | 7806  |
| ML0050 | 390  | 925981  | 6964  | 8838  |
| ML0010 | 390  | 2447153 | 3824  | 10621 |
| ML0031 | 420  | 4508618 | 8670  | 11248 |
| ML0053 | 480  | 519768  | 8205  | 8123  |
| ML0032 | 450  | 1865779 | 3920  | 9642  |
| ML0052 | 450  | 923820  | 9521  | 9175  |
| ML0012 | 450  | 1368424 | 2798  | 10227 |
| ML0054 | 510  | 797187  | 11526 | 9283  |
| ML0033 | 480  | 3052642 | 7544  | 10984 |
| ML0014 | 510  | 2474678 | 6415  | 10999 |
| ML0013 | 480  | 1592021 | 3929  | 10546 |
| ML0055 | 540  | 842919  | 8660  | 9599  |
| ML0035 | 540  | 974408  | 5763  | 9231  |
| ML0015 | 540  | 1401639 | 3899  | 10224 |
| ML0056 | 600  | 484496  | 7847  | 8533  |
| ML0057 | 660  | 743177  | 10651 | 9249  |
| ML0036 | 600  | 1926181 | 5260  | 10746 |
| ML0058 | 720  | 1265333 | 9891  | 10758 |
| ML0059 | 780  | 414804  | 5282  | 8565  |
| ML0038 | 720  | 1908109 | 6017  | 10577 |
| ML0037 | 660  | 2217519 | 5895  | 10812 |
| ML0017 | 660  | 3148306 | 4579  | 12359 |
| ML0019 | 780  | 1536966 | 3495  | 11093 |
| ML0039 | 780  | 2087047 | 7136  | 10963 |
| ML0020 | 1200 | 1339223 | 4206  | 10869 |
| ML0060 | 1200 | 606527  | 7106  | 9609  |
| ML0040 | 1200 | 1342583 | 4567  | 11017 |



## REFERENCES

1. Raff, R. A. Origins of the other metazoan body plans: the evolution of larval forms. *Philos. Trans. R. Soc. Lond. B. Biol. Sci.* **363**, 1473–9 (2008).
2. Gilbert, S. F. *Developmental Biology*. (Sinauer Associates, 2000).
3. Gabriel, W. N. *et al.* The tardigrade *Hypsibius dujardini*, a new model for studying the evolution of development. *Dev. Biol.* **312**, 545–59 (2007).
4. Kimmel, C. B., Ballard, W. W., Kimmel, S. R., Ullmann, B. & Schilling, T. F. Stages of embryonic development of the zebrafish. *Dev. Dyn.* **203**, 253–310 (1995).
5. Cardona, A., Hartenstein, V. & Romero, R. The embryonic development of the triclad *Schmidtea polychoa*. *Dev. Genes Evol.* **215**, 109–31 (2005).
6. Sulston, J. E., Schierenberg, E., White, J. G. & Thomson, J. N. The embryonic cell lineage of the nematode *Caenorhabditis elegans*. *Dev. Biol.* **100**, 64–119 (1983).
7. Degnan, B. M., Leys, S. P. & Larroux, C. Sponge development and antiquity of animal pattern formation. *Integr. Comp. Biol.* **45**, 335–41 (2005).
8. Fischer, A. H., Henrich, T. & Arendt, D. The normal development of *Platynereis dumerilii* (Nereididae, Annelida). *Front. Zool.* **7**, 31 (2010).
9. Gilbert, S. F. *The Early Development of Sea Urchins*. (Sinauer Associates, 2000).
10. Martindale, M. Q. & Henry, J. Q. Intracellular fate mapping in a basal metazoan, the ctenophore *Mnemiopsis leidyi*, reveals the origins of mesoderm and the existence of indeterminate cell lineages. *Dev. Biol.* **214**, 243–57 (1999).
11. Fritzenwanker, J. H., Genikhovich, G., Kraus, Y. & Technau, U. Early development and axis specification in the sea anemone *Nematostella vectensis*. *Dev. Biol.* **310**, 264–79 (2007).
12. Simão, F. A., Waterhouse, R. M., Ioannidis, P., Kriventseva, E. V & Zdobnov, E. M. BUSCO: assessing genome assembly and annotation completeness with single-copy orthologs. *Bioinformatics* (2015). doi:10.1093/bioinformatics/btv351
13. Tu, Q., Cameron, R. A. & Davidson, E. H. Quantitative developmental transcriptomes of the sea urchin *Strongylocentrotus purpuratus*. *Dev. Biol.* **385**, 160–7 (2014).
14. Tu, Q., Cameron, R. A., Worley, K. C., Gibbs, R. A. & Davidson, E. H. Gene structure in the sea urchin *Strongylocentrotus purpuratus* based on transcriptome analysis. *Genome Res.* **22**, 2079–87 (2012).
15. TJ Lubinski, BR Granger, DJ Stefanik, LE Friedman, SJ McAnulty, RM Schweiker, J. F. A revised StellaBase enables comparative transcriptomic studies on multiple populations, life stages, and environmental conditions in the model cnidarian, *Nematostella vectensis*. *Submitted*
16. Fernandez-Valverde, S. L., Calcino, A. D. & Degnan, B. M. Deep developmental transcriptome sequencing uncovers numerous new genes and enhances gene annotation in the sponge *Amphimedon queenslandica*. *BMC Genomics* **16**, 387 (2015).
17. Ryan, J. F. *et al.* The genome of the ctenophore *Mnemiopsis leidyi* and its implications for cell type evolution. *Science* **342**, 1242592 (2013).
18. Moreland, R. T. *et al.* A customized Web portal for the genome of the ctenophore *Mnemiopsis leidyi*. *BMC Genomics* **15**, 316 (2014).
